# Supplementary material for: Guiding the osteogenic fate of mouse and human mesenchymal stem cells through feedback system control
Source: PubMed Central journal article supplement — Sci Rep. 2013 Dec 5;3:3420. doi: 10.1038/srep03420 (PMC3851880; doi:10.1038/srep03420), 2013-12-05
Supplement: srep03420-s1.pdf [file srep03420-s1.pdf]

## SUPPLEMENTARY INFORMATION

### **Guiding the osteogenic fate of mouse and human mesenchymal stem cells through feedback system control**

Yoshitomo Honda<sup>1,2,3</sup>, Xianting Ding<sup>4,5</sup>, Federico Mussano<sup>1,6</sup>, Akira Wiberg<sup>1</sup>, Chih-ming Ho<sup>4</sup>, Ichiro Nishimura<sup>1,\*</sup>

1: The Weintraub Center for Reconstructive Biotechnology, Division of Advanced Prosthodontics, UCLA School of Dentistry, Box 951668, Los Angeles, CA, 90095, USA

2: Craniofacial Function Engineering and Research Unit for Interface Oral Health Science, Tohoku University Graduate School of Dentistry, 4-1 Seiryomachi, Aoba-ku, Sendai, 980-8575, Japan

3: Institute of Dental Research, Osaka Dental University, 8-1 Kuzuha Hanazonocho, Hirakata-Shi, Osaka, 573-1121, Japan

4: Department of Mechanical and Aerospace Engineering, UCLA, 420 Westwood Plaza, Los Angeles, CA, 90095, USA

5: Department of Biomedical Engineering, Med-X Research Institute, Shanghai Jiao Tong University, 1954 Huashan Road, Shanghai, 200030, China

6: Department of Surgery, Dental School, University of Turin, via Nizza 230, 10127, Turin, Italy

\*Corresponding author

Supplementary Information contains:  
Supplementary Table S1  
Supplementary References of Osteogenic Factors  
Supplementary Figures S1-S3  
Supplementary Reference List for Table 2

**Supplementary Table S1: Concentrations of extrinsic factors reported in osteogenic media.**

| Extrinsic Factors          | Reported concentrations in the literature                                                          |
|----------------------------|----------------------------------------------------------------------------------------------------|
| AA2P, AA ( $\mu\text{M}$ ) | 10, 25, 50, 119.19, 200, 238.38, 250, 300, 476.76, >500                                            |
| VD3 (nM)                   | 0.1, 1, 10, 100, 1000                                                                              |
| BMP-2 (ng/mL)              | 1, 3, 5, 6.25, 10, 12.5, 25, 30, 40, 50, 100,<br>150, 200, 250, 300, 400, 500, 800, 1000           |
| Hep ( $\mu\text{g/mL}$ )   | 0.1, 0.2, 0.3, 0.5, 0.625, 1, 1.25, 1.5, 2, 2.5,<br>3, 4, 5, 6, 10, 15, 20, 30, 50, 100, 200, 2000 |
| RA (nM)                    | < 1, 1, 2.5, 5, 10, 20, 100, 1000, 2500                                                            |
| Dex (nM)                   | < 1, 1, 10, 100, 1000                                                                              |
| beta-GP (mM)               | < 1, 5, 8, 10, 50                                                                                  |

## Supplementary References of Osteogenic Factors

### Growth Factors:

- Arosarena, O. A. & Puleo, D. In vitro effects of combined and sequential bone morphogenetic protein administration. *Arch Facial Plast Surg.* **9**, 242-247 (2007).
- Ghayor, C., Ehrbar, M., San Miguel, B., Gratz, K. W. & Weber, F.E. cAMP enhances BMP2-signaling through PKA and MKP1-dependent mechanisms. *Biochem Biophys Res Commun.* **381**, 247-252 (2009).
- Rawadi, G., Vayssiere, B., Dunn, F., Baron, R. & Roman-Roman, S. BMP-2 controls alkaline phosphatase expression and osteoblast mineralization by a Wnt autocrine loop. *J Bone Miner Res.* **18**, 1842-1853 (2003).
- Shea, C. M., Edgar, C. M., Einhorn, T. A. & Gerstenfeld, L. C. BMP treatment of C3H10T1/2 mesenchymal stem cells induces both chondrogenesis and osteogenesis. *J Cell Biochem.* **90**, 1112-1127 (2003).
- Zhou, H. *et al.* Enhanced bioactivity of bone morphogenetic protein-2 with low dose of 2-N, 6-O-sulfated chitosan in vitro and in vivo. *Biomaterials.* **30**, 1715-1724 (2009).
- Jeong, B. C. *et al.* The orphan nuclear receptor estrogen receptor-related receptor gamma negatively regulates BMP2-induced osteoblast differentiation and bone formation. *J Biol Chem.* **284**, 14211-14218 (2009).

### Nuclear Receptor Ligands:

#### **Steroids**

- Buttery, L. D. *et al.* Differentiation of osteoblasts and in vitro bone formation from murine embryonic stem cells. *Tissue Eng Part A.* **7**, 89-99 (2001).
- Mikami, Y., Asano, M., Honda, M. J. & Takagi, M. Bone morphogenetic protein 2 and dexamethasone synergistically increase alkaline phosphatase levels through JAK/STAT signaling in C3H10T1/2 cells. *J Cell Physiol.* **223**, 123-133 (2010).
- Pereira, R. C., Delany, A. M. & Canalis, E. Effects of cortisol and bone morphogenetic protein-2 on stromal cell differentiation: correlation with CCAAT-enhancer binding protein expression. *Bone.* **30**, 685-691 (2002).
- Tropel, P. *et al.* Isolation and characterisation of mesenchymal stem cells from adult mouse bone marrow. *Exp Cell Res.* **295**, 395-406 (2004).
- Hamidouche, Z. *et al.* Autocrine fibroblast growth factor 18 mediates dexamethasone-induced osteogenic differentiation of murine mesenchymal stem cells. *J Cell Physiol.* **224**, 509-515 (2010).

#### **Retinoic Acid**

- Chen, M., Huang, H. Z., Wang, M. & Wang, A. X. Retinoic acid inhibits osteogenic differentiation of mouse embryonic palate mesenchymal cells. *Birth Defects Res A Clin Mol Teratol.* **88**, 965-970 (2010).
- Dingwall, M., Marchildon, F., Gunanayagam, A., Louis, C. S. & Wiper-Bergeron, N. Retinoic acid-induced Smad3 expression is required for the induction of osteoblastogenesis of mesenchymal stem cells. *Differentiation.* **82**, 57-65 (2011).
- Makhijani, N. S., Bischoff, D. S. & Yamaguchi, D. T. Regulation of proliferation and migration in retinoic acid treated C3H10T1/2 cells by TGF-beta isoforms. *J Cell Physiol.* **202**, 304-313 (2005).

- Skillington, J., Choy, L. & Derynck, R. Bone morphogenetic protein and retinoic acid signaling cooperate to induce osteoblast differentiation of preadipocytes. *J Cell Biol.* **159**, 135-146 (2002).
- Suzuki, S., Koga, M., Takaoka, K., Ono, K. & Sato, B. Effects of retinoic acid on steroid and vitamin D3 receptors in cultured mouse osteosarcoma cells. *Bone.* **14**, 7-12 (1993).
- Wan, D. C. *et al.* Osteogenic differentiation of mouse adipose-derived adult stromal cells requires retinoic acid and bone morphogenetic protein receptor type IB signaling. *Proc Natl Acad Sci U S A.* **103**, 12335-12340 (2006).
- Wan, D. C. *et al.* Refining retinoic acid stimulation for osteogenic differentiation of murine adipose-derived adult stromal cells. *Tissue Eng.* **13**, 1623-1631 (2007).
- Zhang, W. *et al.* Retinoic acids potentiate BMP9-induced osteogenic differentiation of mesenchymal progenitor cells. *PLoS One.* **5**, e11917 (2010).

#### **Vitamin D**

- Drissi, H. *et al.* 1,25-(OH)<sub>2</sub>-vitamin D<sub>3</sub> suppresses the bone-related Runx2/Cbfa1 gene promoter. *Exp Cell Res.* **274**, 323-333 (2002).
- Luegmayer, E. *et al.* 1,25-Dihydroxy vitamin D<sub>3</sub> and tri-iodothyronine stimulate the expression of a protein immunologically related to osteocalcin. *J Histochem Cytochem.* **46**, 477-486 (1998).
- Malladi, P., Xu, Y., Yang, G. P. & Longaker, M. T. Functions of vitamin D, retinoic acid, and dexamethasone in mouse adipose-derived mesenchymal cells. *Tissue Eng.* **12**, 2031-2040 (2006).
- Shi, Y.C. *et al.* Effects of continuous activation of vitamin D and Wnt response pathways on osteoblastic proliferation and differentiation. *Bone.* **41**, 87-96 (2007).

#### **Minerals:**

- Chung, C. H., Golub, E.E., Forbes, E., Tokuoka, T. & Shapiro, I. M. Mechanism of action of beta-glycerophosphate on bone cell mineralization. *Calcif Tissue Int.* **51**, 305-311 (1992).

#### **Heparin:**

- Andress, D. L. Heparin modulates the binding of insulin-like growth factor (IGF) binding protein-5 to a membrane protein in osteoblastic cells. *J Biol Chem.* **270**, 28289-28296 (1995).
- Kanzaki, S. *et al.* Heparin inhibits BMP-2 osteogenic bioactivity by binding to both BMP-2 and BMP receptor. *J Cell Physiol.* **216**, 844-850 (2008).
- Ling, L. *et al.* Synergism between Wnt3a and heparin enhances osteogenesis via a phosphoinositide 3-kinase/Akt/RUNX2 pathway. *J Biol Chem.* **285**, 26233-26244 (2010).
- Takada, T. *et al.* Sulfated polysaccharides enhance the biological activities of bone morphogenetic proteins. *J Biol Chem.* **278**, 43229-43235 (2003).

#### **Extracellular Matrix:**

- Haupt, L. M. *et al.* The heparan sulfate proteoglycan (HSPG) glypican-3 mediates commitment of MC3T3-E1 cells toward osteogenesis. *J Cell Physiol.* **220**, 780-791 (2009).
- Hsiong, S. X., Carampin, P., Kong, H. J., Lee, K. Y. & Mooney, D. J. Differentiation stage alters matrix control of stem cells. *J Biomed Mater Res A.* **85**, 145-156 (2008).
- Jiao, X. *et al.* Heparan sulfate proteoglycans (HSPGs) modulate BMP2 osteogenic bioactivity in C2C12 cells. *J Biol Chem.* **282**, 1080-1086 (2007).

Xiao, G. *et al.* Bone morphogenetic proteins, extracellular matrix, and mitogen-activated protein kinase signaling pathways are required for osteoblast-specific gene expression and differentiation in MC3T3-E1 cells. *J Bone Miner Res.* **17**, 101-110 (2002).

**Others:**

Kumar, S., Mahendra, G. & Ponnazhagan, S. Determination of osteoprogenitor-specific promoter activity in mouse mesenchymal stem cells by recombinant adeno-associated virus transduction. *Biochim Biophys Acta.* **1731**, 95-103 (2005).

Kang, S. *et al.* Wnt signaling stimulates osteoblastogenesis of mesenchymal precursors by suppressing CCAAT/enhancer-binding protein alpha and peroxisome proliferator-activated receptor gamma. *J Biol Chem.* **282**, 14515-14524 (2007).

Maggini, J. *et al.* Mouse bone marrow-derived mesenchymal stromal cells turn activated macrophages into a regulatory-like profile. *PLoS One.* **5**, e9252 (2010).

Matsuguchi, T. *et al.* JNK activity is essential for Atf4 expression and late-stage osteoblast differentiation. *J Bone Miner Res.* **24**, 398-410 (2009).

Peng, S. *et al.* Strontium promotes osteogenic differentiation of mesenchymal stem cells through the Ras/MAPK signaling pathway. *Cell Physiol Biochem.* **23**, 165-174 (2009).

**Figure S1 | Double-objective FSC iterations using ALP expression as a biological fitness assay.** (a) The representative iteration course change of the extrinsic factor concentrations. RA concentration increased in each iteration, whereas other factors showed a tendency of gradual decrease. Hep showed a sudden increase after the 7th iteration. (b) Contribution of RA for ALP activity. Removal of RA from an original cocktail completely abolished early ALP expression of D1 cells and L929 cells. D1 cells and L929 cells were seeded at 3125/cm<sup>2</sup>. ALP activity was measured at day 3. Data show mean ± s.d. (n=3 per group). \*\*: p<0.01 and \*: p<0.05 compared to the original cocktail (ANOVA with a Dunnett's test).

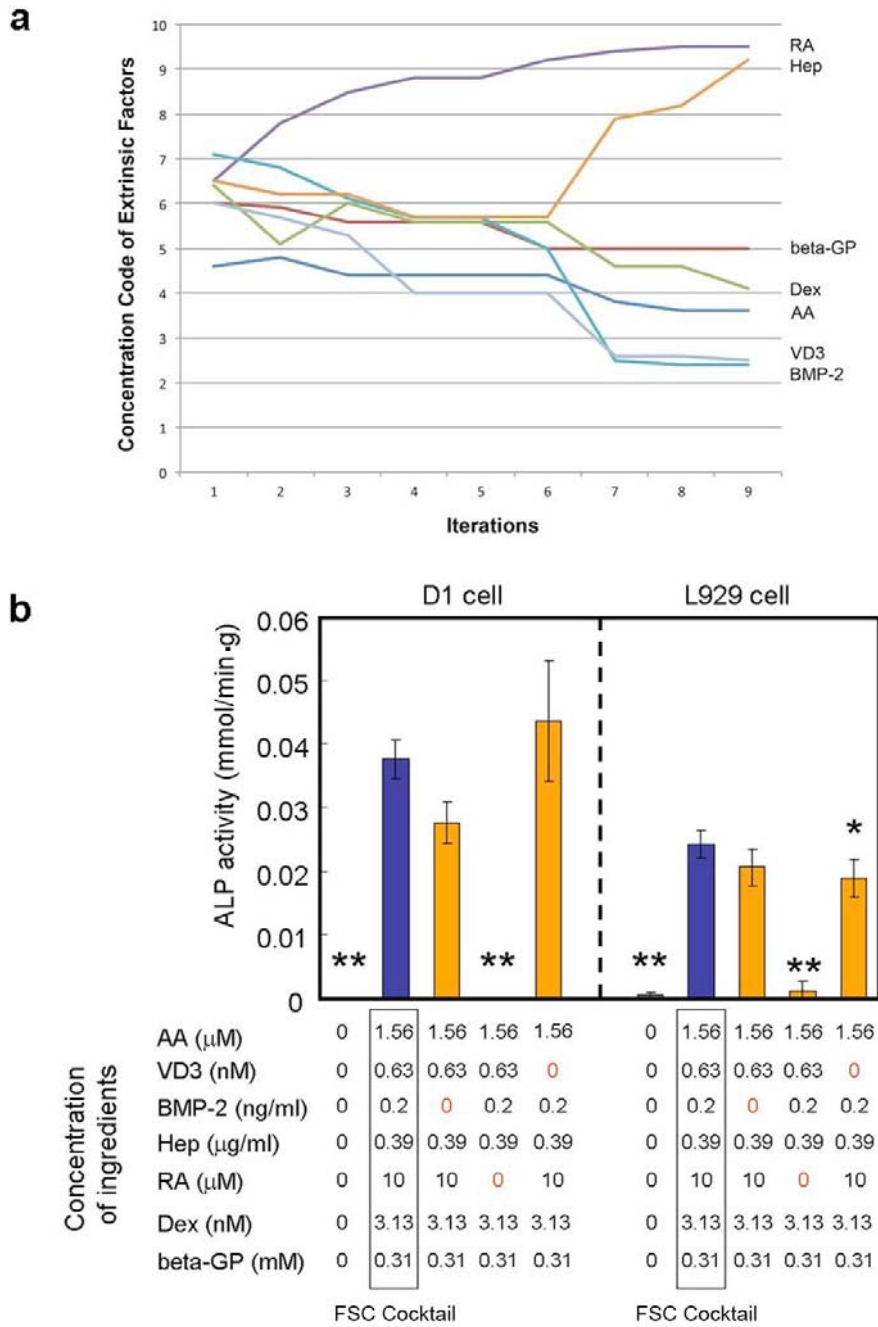

**Figure S2 | Classification of drug cocktails.** (a) Classification of drug cocktails used in FSC-DE with mineralization assay in accordance with those mineralization indexes. *Italic numbers*: mineralization index. After 9 iterations, 14 cocktails (boxed) were found to induce the equivalent of or at least one half of  $\text{Ca}^{2+}$  deposition as compared to TB containing high dose of BMP-2 (100 ng/ml). (b) Classification of the above 14 drug cocktails (boxed) in accordance with BMP-2 concentration. *Italic numbers*: BMP-2 concentration. Eight drug cocktails containing less than 25 ng/ml BMP-2 were used in the further experiment.

a

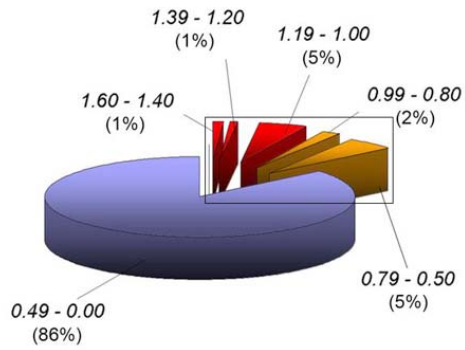

b

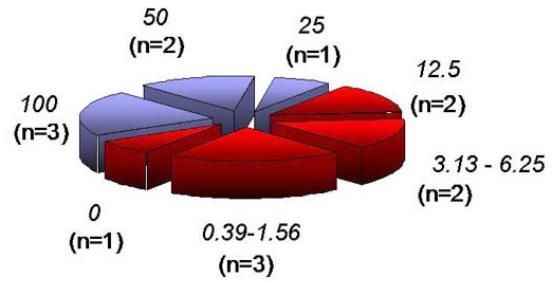

**Figure S3| Effect of candidate cocktails on *in vitro* mineralization of L929 fibroblasts.** None of the tested cocktails induced *in vitro* mineralization. Cells were seeded at 45,000/cm<sup>2</sup>; once the cells became confluent, the media were changed to the basal media and then to the media with each drug cocktail. Ca<sup>2+</sup> content in the well was measured at day 7. Data represent mean ± s.d. (n = 3 per group).

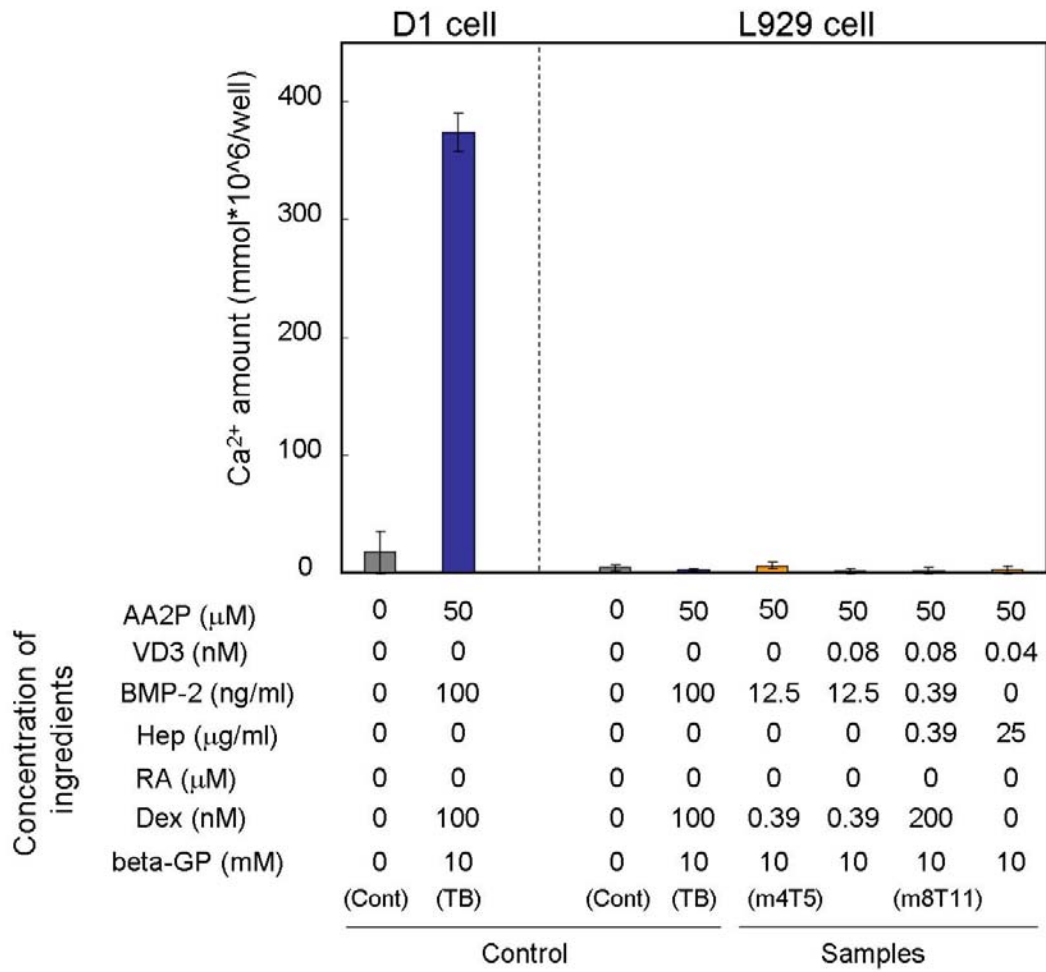



## Supplementary Reference List for Table 2.

- R1: Vissers et al. *Am J Clin Nutr.* **93**, 292-301 (2011). (Serum, Vitamin C, Mouse)  
R2: Langlois et al. *Circulation.* **103**, 1863-1868 (2001). (Serum, L-ascorbic acid, Human)  
R3: Padilla et al. *Livestock Science.* **101**, 300-304 (2006). (Plasma, Vitamin C, Cow)  
R4: Gattineni et al. *Am J Physiol Renal Physiol.* **301**, F371-377 (2011). (Serum, VD3, Mouse)  
R5: Bikle et al. *J Clin Inv.* **74**, 1966-1971 (1984). (Serum, VD3, Human)  
R6: Ametaj et al. *Vet Immunol Immunopath.* **52**, 77-90 (1996). (Plasma, VD3, Cow)  
R7: Nie et al. *Biomaterials.* **30**, 892-901 (2009). (Serum, BMP-2, Mouse)  
R8: Park et al. *Cancer Res Treat.* **40**, 127-132 (2008). (Serum, BMP-2, Human)  
R9: Hu et al. *Tohoku Exp Med J.* **222**, 195-200 (2010). (FBS, BMP-2, Cow)  
R10: Engelberg et al. *Circulation.* **23**, 578-581 (1961). (Plasma, Hep, Human)  
R11: Kane.M et al. *Biochem J.* **388**, 363-369 (2005). (Serum, atRA, Mouse)  
R12: Schmidt et al. *Analytical Biochem.* **315**, 36-48 (2003). (Serum, atRA, Mouse, Human)  
R13: Leenheer et al. *J Lipid Res.* **23**, 1362-1367 (1982). (Serum, atRA, Human)  
R14: Stanulis-Praeger. *Mech Ageing Dev.* **33**, 221-235 (1986). (FBS, RA, Cow)  
R15: Malisch et al. *Physiol Biochem Zool.* **80**, 146-156 (2007). (Plasma, Corticosterone, Mouse)  
R16: Coleman et al. *Diabetologia.* **13**, 25-26. (1977). (Plasma, Corticosterone, Mouse)  
R17: Ireland et al. *J Cell Biochem.* **91**, 594-601 (2004). (Serum, Hydrocortisone, Human)  
R18: Venkateseshu et al. *J Dairy Sci.* **53**, 480-483 (1970). (Plasma, Cortisol, Corticosterone, Cow)  
R19: Christov et al. *Endocrinology.* **152**, 2031-2036 (2011). (Serum, Serum phosphate, Mouse)  
R20: Hannon et al. *Nephrol Dial Transplant.* **19**, 386-390 (2004). (Serum, Serum phosphate, Human)  
R21: Donecker et al. *Can Vet. J.* **23**, 355-357 (1982). (Serum, Serum phosphate, Cow)  
R22: Takamizawa et al. *Cell Biol Int.* **28**, 255-265 (2004).  
R23: Bellows et al. *Bone.* **23**, 119-125 (1998).  
R24: Eijken et al. *Mol Endocrinol.* **19**, 621-631 (2005).
